# Supplementary material
Source: Springer Nature journal article supplement (https://www.springermedizin.de/resource/supplementary/12913_2008_778_MOESM2_ESM.pdf/9535534)
Supplement: MOESM2 [file 9535534]

**Satisfaction with general services across waves**

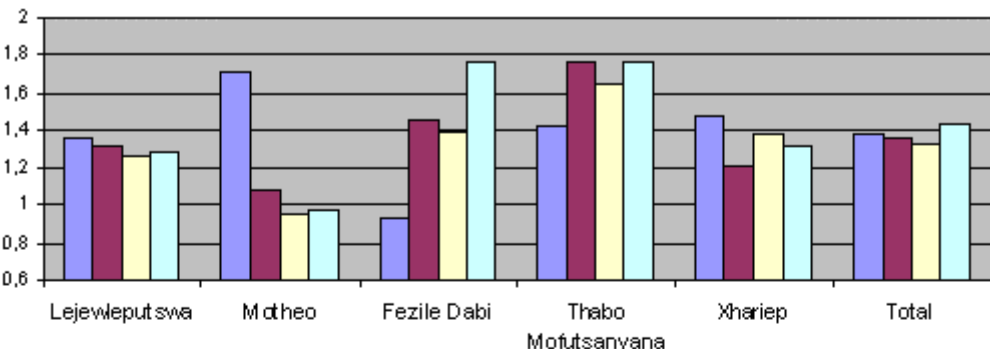

**Satisfaction with nurses across waves**

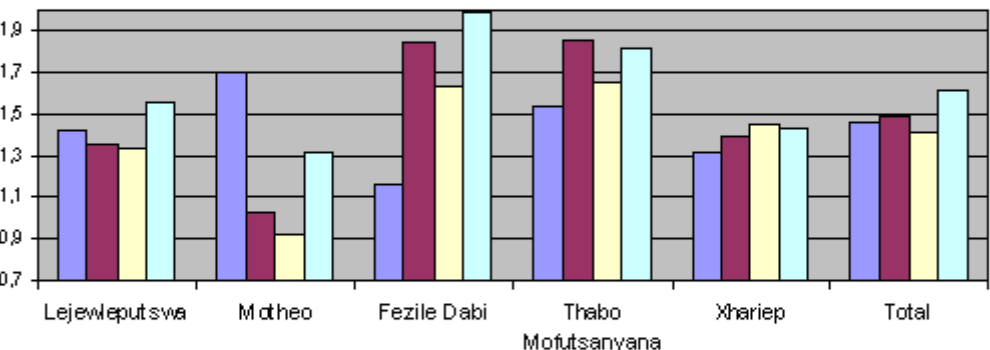

**Satisfaction with waiting times across waves**

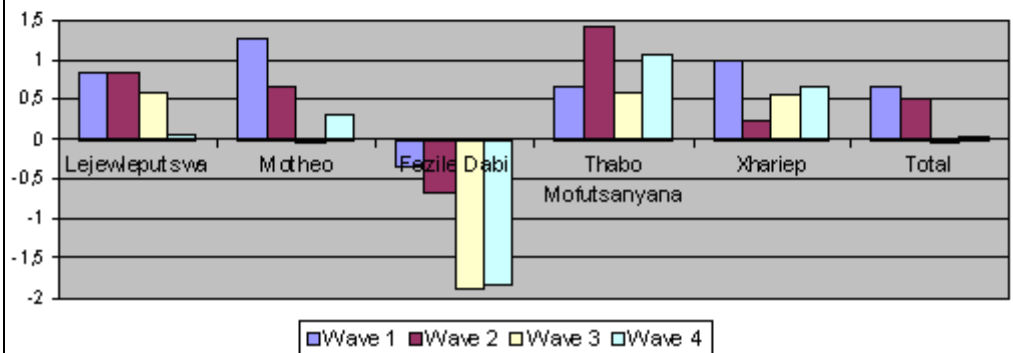

■ Wave 1 
 ■ Wave 2 
 ■ Wave 3 
 ■ Wave 4
